# Supplementary material for: Homologous Recombination Repair Gene Alterations Are Associated with Tumor Mutational Burden and Survival of Immunotherapy
Source: MDPI journal article supplement (doi:10.3390/cancers15235608), 2023-11-27
Supplement: s1 [file s1]

## Supplementary data

**Supplementary Table S1.** List of genes analyzed with FoundationOne® CDx

A. gene list: the entire coding sequence was examined for the detection of base substitutions, insertion/deletions, and copy number alterations.

|        |        |                |                 |          |        |         |                    |        |         |
|--------|--------|----------------|-----------------|----------|--------|---------|--------------------|--------|---------|
| ABL1   | ACVR1B | AKT1           | AKT2            | AKT3     | ALK    | ALOX12B | AMER1              | APC    | AR      |
| ARAF   | ARFRP1 | ARID1A         | ASXL1           | ATM      | ATR    | ATRX    | AURKA              | AURKB  | AXIN1   |
| AXL    | BAP1   | BARD1          | BCL2            | BCL2L1   | BCL2L2 | BCL6    | BCOR               | BCORL1 | BRAF    |
| BRCA1  | BRCA2  | BRD4           | BRIP1           | BTG1     | BTG2   | BTK     | C11orf30           | CALR   | CARD11  |
| CASP8  | CBFB   | CBL            | CCND1           | CCND2    | CCND3  | CCNE1   | CD22               | CD274  | CD70    |
| CD79A  | CD79B  | CDC73          | CDH1            | CDK12    | CDK4   | CDK6    | CDK8               | CDKN1A | CDKN1B  |
| CDKN2A | CDKN2B | CDKN2C         | CEBPA           | CHEK1    | CHEK2  | CIC     | CREBBP             | CRKL   | CSF1R   |
| CSF3R  | CTCF   | CTNNA1         | CTNNB1          | CUL3     | CUL4A  | CXCR4   | CYP17A1            | DAXX   | DDR1    |
| DDR2   | DIS3   | DNMT3A         | DOT1L           | EED      | EGFR   | EP300   | EPHA3              | EPHB1  | EPHB4   |
| ERBB2  | ERBB3  | ERBB4          | ERCC4           | ERG      | ERRFI1 | ESR1    | EZH2               | FAM46C | FANCA   |
| FANCC  | FANCG  | FANCL          | FAS             | FBXW7    | FGF10  | FGF12   | FGF14              | FGF19  | FGF23   |
| FGF3   | FGF4   | FGF6           | FGFR1           | FGFR2    | FGFR3  | FGFR4   | FH                 | FLCN   | FLT1    |
| FLT3   | FOXL2  | FUBP1          | GABRA6          | GATA3    | GATA4  | GATA6   | GID4<br>(C17orf39) | GNA11  | GNA13   |
| GNAQ   | GNAS   | GRM3           | GSK3B           | H3F3A    | HDAC1  | HGF     | HNF1A              | HRAS   | HSD3B1  |
| ID3    | IDH1   | IDH2           | IGF1R           | IKBKE    | IKZF1  | INPP4B  | IRF2               | IRF4   | IRS2    |
| JAK1   | JAK2   | JAK3           | JUN             | KDM5A    | KDM5C  | KDM6A   | KDR                | KEAP1  | KEL     |
| KIT    | KLHL6  | KMT2A<br>(MLL) | KMT2D<br>(MLL2) | KRAS     | LTK    | LYN     | MAF                | MAP2K1 | MAP2K2  |
| MAP2K4 | MAP3K1 | MAP3K13        | MAPK1           | MCL1     | MDM2   | MDM4    | MED12              | MEF2B  | MEN1    |
| MERTK  | MET    | MITF           | MKNK1           | MLH1     | MPL    | MRE11A  | MSH2               | MSH3   | MSH6    |
| MST1R  | MTAP   | MTOR           | MUTYH           | MYC      | MYCL   | MYCN    | MYD88              | NBN    | NF1     |
| NF2    | NFE2L2 | NFKBIA         | NKX2-1          | NOTCH1   | NOTCH2 | NOTCH3  | NPM1               | NRAS   | NT5C2   |
| NTRK1  | NTRK2  | NTRK3          | P2RY8           | PALB2    | PARK2  | PARP1   | PARP2              | PARP3  | PAX5    |
| PBRM1  | PDCD1  | PDCD1L G2      | PDGFRA          | PDGFRB   | PDK1   | PIK3C2B | PIK3C2G            | PIK3CA | PIK3CB  |
| PIK3R1 | PIM1   | PMS2           | POLD1           | POLE     | PPARG  | PPP2R1A | PPP2R2A            | PRDM1  | PRKAR1A |
| PRKCI  | PTCH1  | PTEN           | PTPN11          | PTPRO    | QKI    | RAC1    | RAD21              | RAD51  | RAD51B  |
| RAD51C | RAD51D | RAD52          | RAD54L          | RAF1     | RARA   | RB1     | RBM10              | REL    | RET     |
| RICTOR | RNF43  | ROS1           | RPTOR           | SDHA     | SDHB   | SDHC    | SDHD               | SETD2  | SF3B1   |
| SGK1   | SMAD2  | SMAD4          | SMARCA4         | SMARCB1  | SMO    | SNCAIP  | SOC3               | SOX2   | SOX9    |
| SPEN   | SPOP   | SRC            | STAG2           | STAT3    | STK11  | SUFU    | SYK                | TBX3   | TEK     |
| TET2   | TGFBR2 | TIPARP         | TNFAIP3         | TNFRSF14 | TP53   | TSC1    | TSC2               | TYRO3  | U2AF1   |
| VEGFA  | VHL    | WHSC1          | WHSC1L1         | WT1      | XPO1   | XRCC2   | ZNF217             | ZNF703 |         |

B. Gene list: select rearrangements of the indicated genes were examined.

|                        |                   |                          |                       |                                      |
|------------------------|-------------------|--------------------------|-----------------------|--------------------------------------|
| ALK intron 18, 19      | BCL2 3' UTR       | BCR intron 8, 13, 14     | BRAF intron 7–10      | BRCA1 intron 2, 7, 8, 12, 16, 19, 20 |
| BRCA2 intron 2         | CD74 intron 6–8   | EGFR intron 7, 15, 24–27 | ETV4 intron 5, 6      | ETV5 intron 6, 7                     |
| ETV6 intron 5, 6       | EWSR1 intron 7–13 | EZR intron 9–11          | FGFR1 intron 1, 5, 17 | FGFR2 intron 1, 17                   |
| FGFR3 intron 17        | KIT intron 16     | KMT2A(MLL) intron 6–11   | MSH2 intron 5         | MYB intron 14                        |
| MYC intron 1           | NOTCH2 intron 26  | NTRK1 intron 8–10        | NTRK2 intron 12       | NUTM1 intron 1                       |
| PDGFRA intron 7, 9, 11 | RAF1 intron 4–8   | RARA intron 2            | RET intron 7–11       | ROS1 intron 31–35                    |
| RSPO2 intron 1         | SDC4 intron 2     | SLC34A2 intron 4         | TERC non-coding RNA   | TERT promoter                        |
| TMPRSS2 intron 1–3     |                   |                          |                       |                                      |

**Supplementary Table S2.** Details of MSI-high cases and MMR gene-mutant cases  
MSI-high case

| Sample     | Primary site | MMR gene | TMB (mut/Mb) | Other gene                   |
|------------|--------------|----------|--------------|------------------------------|
| SUR-758248 | colorectal   | Wild     | 24           | ATM mutant (compound hetero) |
| SUR-758302 | esophageal   | Wild     | 19           | BRCA2 truncation             |
| SUR-758323 | breast       | MSH2     | 82           |                              |
| SUR-758613 | gastric      | MSH3     | 26           |                              |

MMR: mismatch repair, TMB: tumor mutational burden

MMR gene-mutant case

| Sample     | Primary site | MMR gene    | Alteration |
|------------|--------------|-------------|------------|
| SUR-758074 | breast       | <i>PMS2</i> | R315*      |
| SUR-758323 | breast       | <i>MSH2</i> | Q409fs*7   |
| SUR-758248 | colorectal   | <i>MSH3</i> | K383fs*32  |
| SUR-758613 | gastric      | <i>MSH3</i> | K383fs*20  |
| SUR-758613 | gastric      | <i>MSH3</i> | K383fs*32  |
| SUR-758831 | esophageal   | <i>MSH2</i> | S612*      |
| SUR-758072 | other        | <i>MSH3</i> | L290fs*10  |

**Supplementary Table S3.** The gene list of MMR genes and HRR genes  
MMR genes

| <i>MLH1</i> | <i>MSH2</i> | <i>MSH6</i> | <i>PMS2</i> | <i>MSH3</i> |
|-------------|-------------|-------------|-------------|-------------|
|-------------|-------------|-------------|-------------|-------------|

HRR genes

|               |              |              |              |              |               |               |               |              |              |
|---------------|--------------|--------------|--------------|--------------|---------------|---------------|---------------|--------------|--------------|
| <i>ARID1A</i> | <i>ATM</i>   | <i>ATR</i>   | <i>ATR</i>   | <i>ATR</i>   | <i>ATR</i>    | <i>ATR</i>    | <i>ATR</i>    | <i>ATR</i>   | <i>ATR</i>   |
| <i>CDK12</i>  | <i>CHEK1</i> | <i>CHEK2</i> | <i>FANCA</i> | <i>FANCC</i> | <i>FANCD2</i> | <i>FANCE</i>  | <i>FANCF</i>  | <i>FANCG</i> | <i>FANCL</i> |
| <i>MRE11A</i> | <i>NBN</i>   | <i>PALB2</i> | <i>RAD50</i> | <i>RAD51</i> | <i>RAD51B</i> | <i>RAD51C</i> | <i>RAD51D</i> | <i>WRN</i>   |              |
